# Supplementary material for: Lasting first impression: Pre-existing immunity restricts mucosal antibody responses during Omicron breakthrough
Source: bioRxiv or medRxiv preprint supplement (doi:10.1101/2023.03.28.23287848), 2023-03-30

a) Summary of pre-pandemic controls and vaccinated cohorts

| Variables                                                                            | Pre-pandemic Controls | Comirnaty / BNT162b2 (Pfizer-BioNtech) vaccinees |                                                      | ChAdOx1 nCoV-19 (AstraZeneca) vaccinees |
|--------------------------------------------------------------------------------------|-----------------------|--------------------------------------------------|------------------------------------------------------|-----------------------------------------|
|                                                                                      | Pre-pandemic (n=20)   | Vaccinated only (n=20)                           | COVID-19 Recovered (Convalescent, vaccinated) (n=10) | Vaccinated only (n=17)                  |
| Age, mean (range), years                                                             | 30.5 (21 – 60)        | 34.6 (26 – 58)                                   | 49.5 (24 – 65)                                       | 46.5 (23 – 69)                          |
| Gender                                                                               |                       |                                                  |                                                      |                                         |
| Female (%)                                                                           | 16 (80.0%)            | 13 (65.0%)                                       | 6 (60.0%)                                            | 10 (58.8)                               |
| Male (%)                                                                             | 4 (20.0%)             | 7 (35.0%)                                        | 4 (40.0%)                                            | 7 (41.2)                                |
| Time from symptom onset till sample collection, mean (range), days                   |                       |                                                  | 478.1 (412 – 534)                                    |                                         |
| Vaccination                                                                          |                       |                                                  |                                                      |                                         |
| Time after 1 <sup>st</sup> shot till sample collection, mean (range), days           |                       | 9.1 (6 – 12)                                     | 12.5 (7 – 18)                                        | 13.4 (7 – 22)                           |
| Time between 1 <sup>st</sup> and 2 <sup>nd</sup> shot, mean (range), days            |                       | 24.0 (21 – 33)                                   | 28.0 (21 – 48)                                       | 83 (70 – 92)                            |
| Time after 2 <sup>nd</sup> shot till sample collection, mean (range), days           |                       | 14.1 (12 – 22)                                   | 20.1 (10 – 34)                                       | 13.4 (7 – 22)                           |
| Time between 2 <sup>nd</sup> shot and 5 months sample collection, mean (range), days |                       | 218.8 (188 – 226)                                |                                                      | 149.6 (101 – 184)                       |
| Time after 3 <sup>rd</sup> shot till sample collection, mean (range), days           |                       | 12.4 (10 – 15)                                   |                                                      | 20.1 (10 – 31)                          |

b) Summary of breakthrough cohorts

| Variables                                                                    | Delta breakthroughs | Omicron BA.2 breakthroughs |
|------------------------------------------------------------------------------|---------------------|----------------------------|
|                                                                              | (n=8)               | (n=10)                     |
| Age, mean (range), years                                                     | 34.6 (19 – 58)      | 54.3 (40 – 66)             |
| Gender                                                                       |                     |                            |
| Female (%)                                                                   | 5 (62.5%)           | 5 (50.0%)                  |
| Male (%)                                                                     | 3 (37.5%)           | 5 (50.0%)                  |
| Vaccination doses prior to breakthrough infection (%)                        | 2 (100.0%)          | 3 (100.0%)                 |
| Time from last vaccination till breakthrough infection, mean (range), months | 3.3 (0.3 – 5.3)     | 3.2 (1.6 – 5.3)            |

c) Sampling timepoints for breakthrough infections

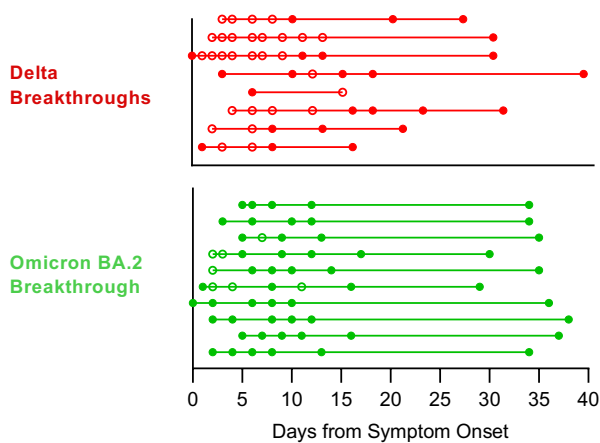

d) Schematic of SARS-CoV-2 spike protein

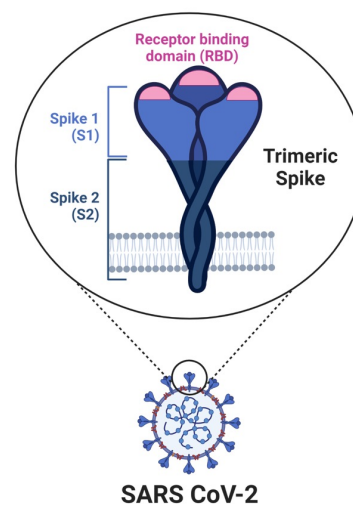

a)

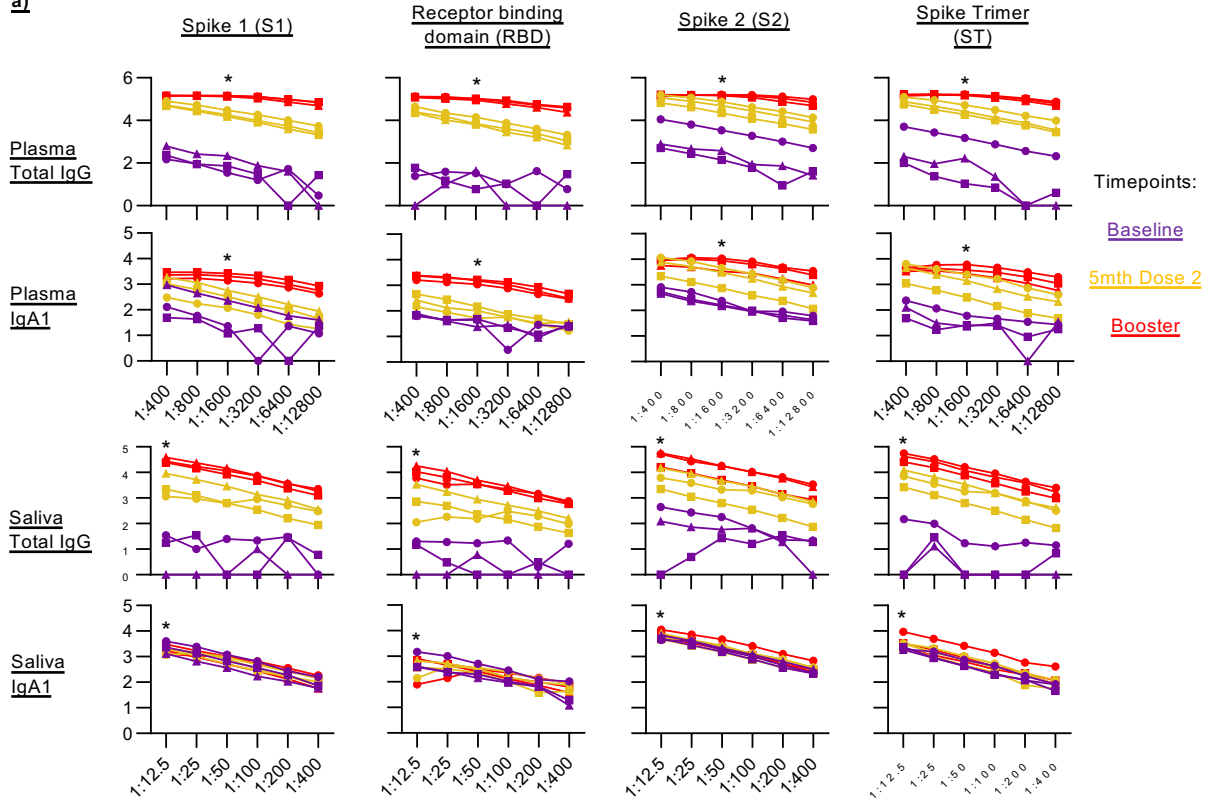

b)

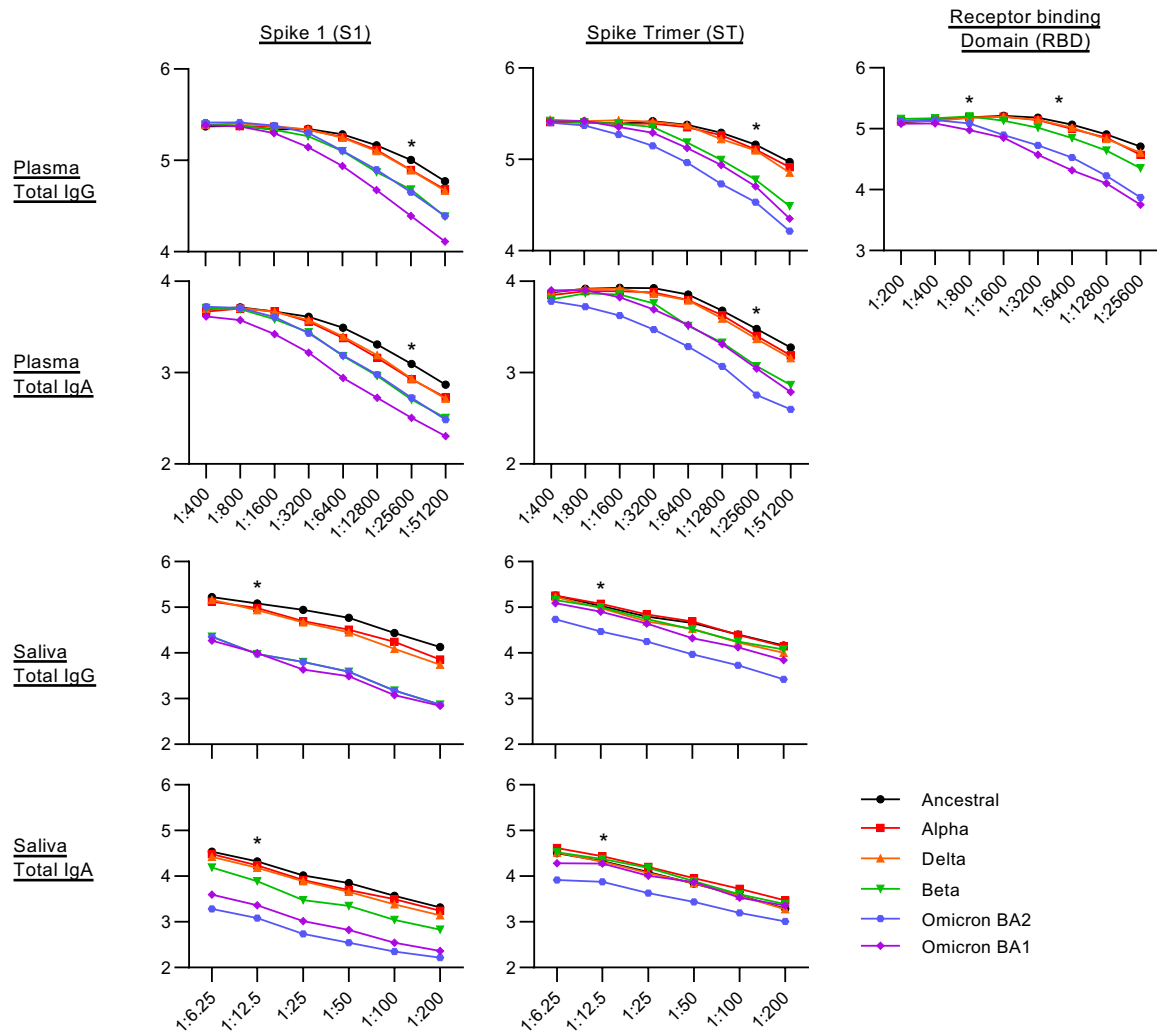

Saliva antibody comparisons after two antigen exposures

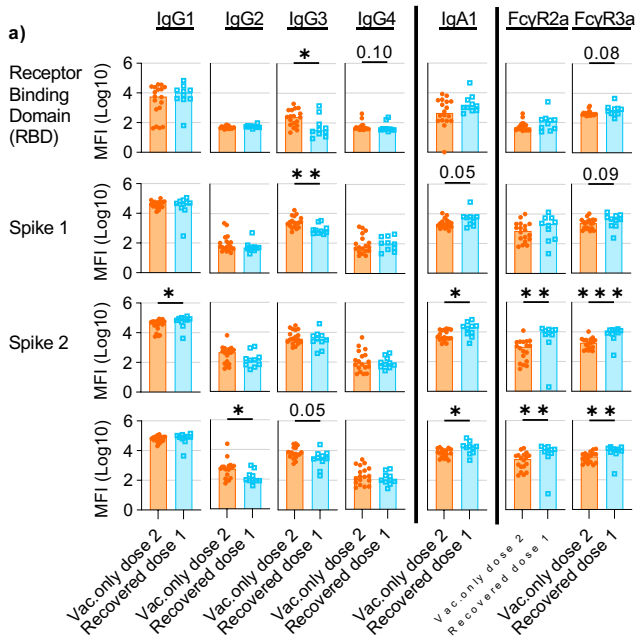

Saliva antibody comparisons after three antigen exposures

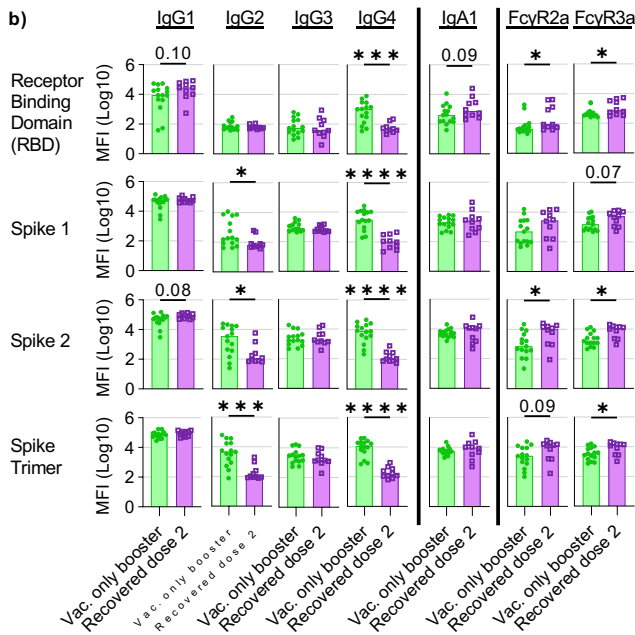

Tear antibody comparisons after three antigen exposure

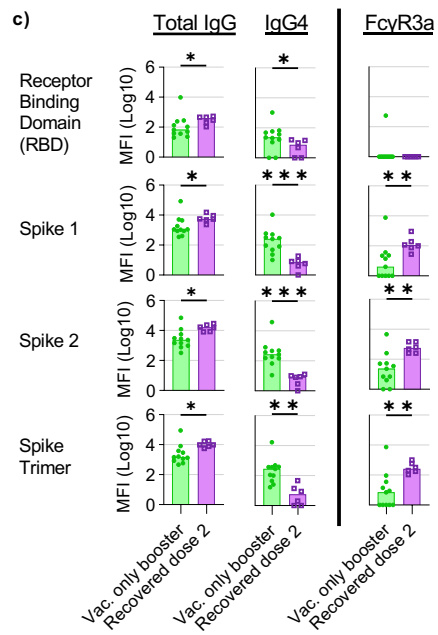

Saliva and tear IgA in COVID-19 recovered individuals following BNT162b2 vaccination

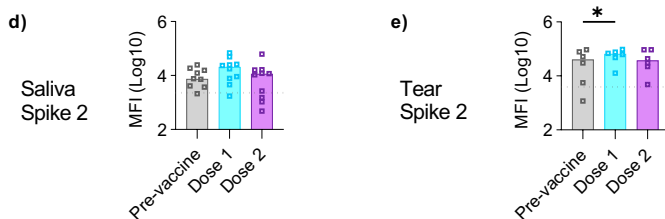

Comparisons of saliva anti-Spike 2 responses after mRNA boosters in vaccinated only cohort

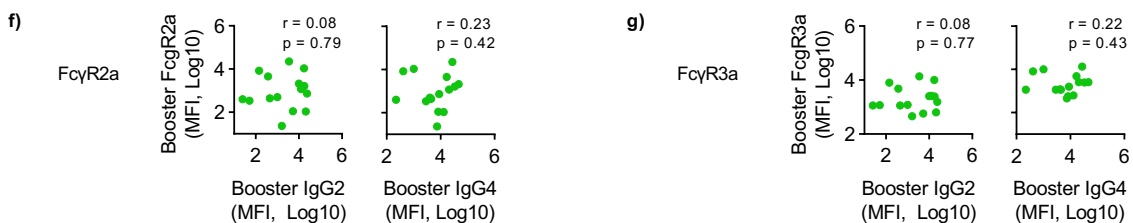

Plasma antibody signatures following BNT162b2 vaccination

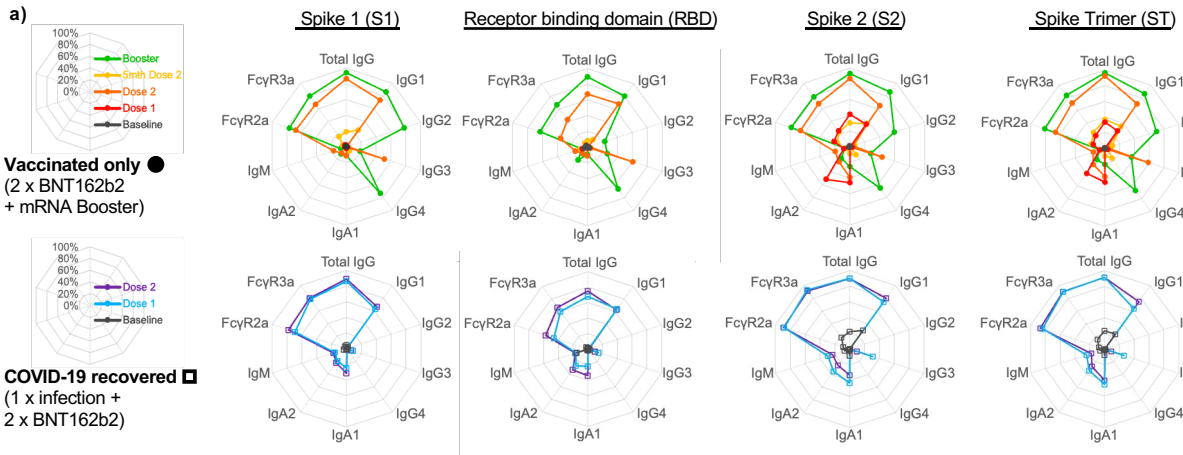

Plasma antibody comparisons after two antigen exposures

Plasma antibody comparisons after three antigen exposures

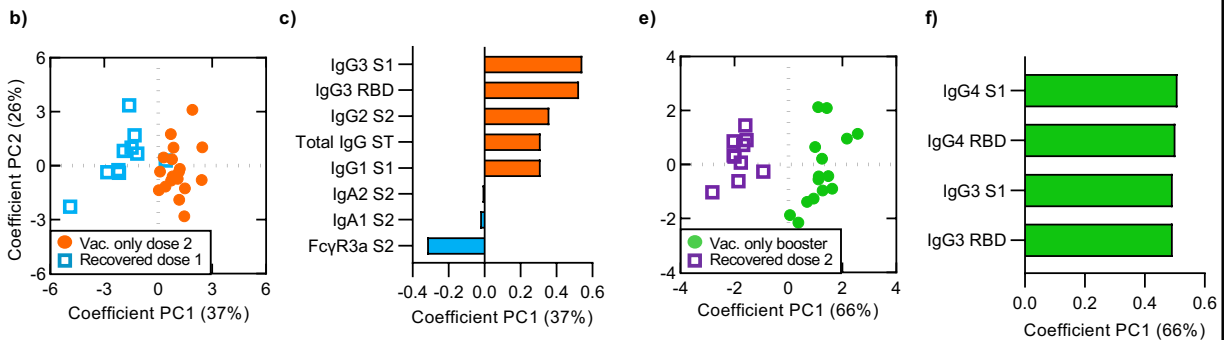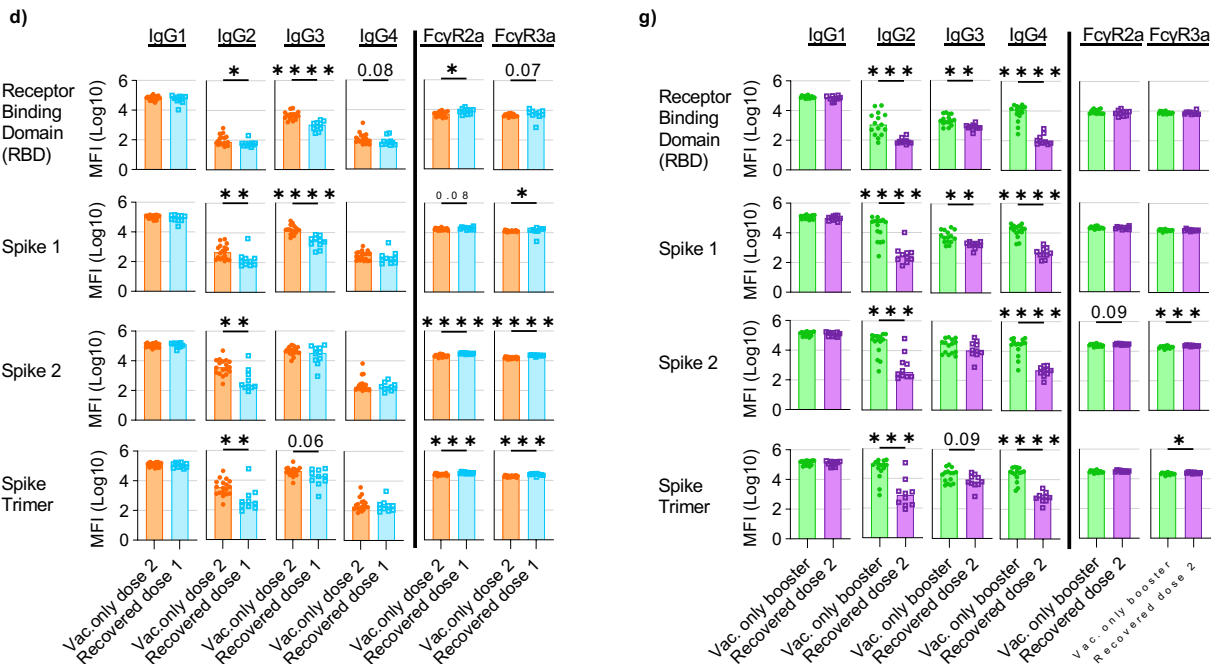

Comparisons of plasma anti-Spike 2 responses after mRNA boosters in vaccinated only cohort

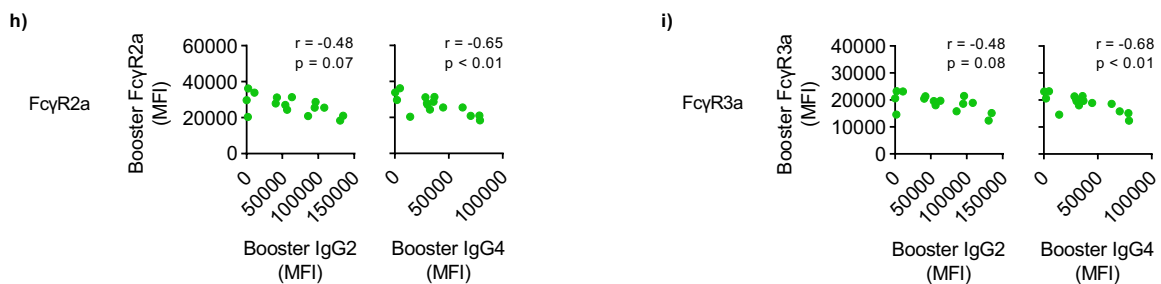

ChAdOx1 nCoV-19 vaccinated cohort timepoints

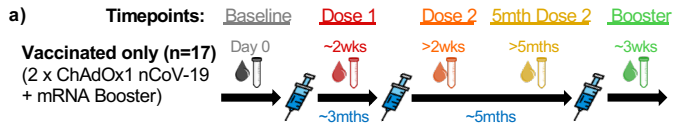

Saliva and plasma antibody signatures following ChAdOx1 nCoV-19 vaccination

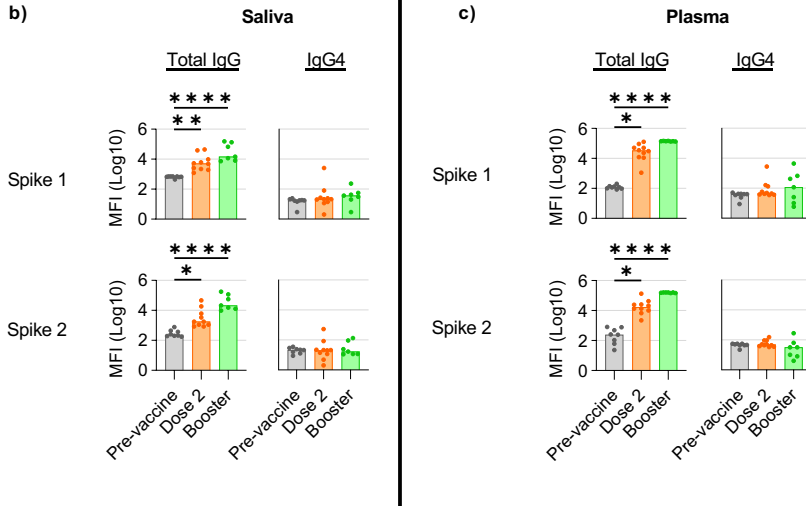

**Breakthrough infections, viral load kinetics**

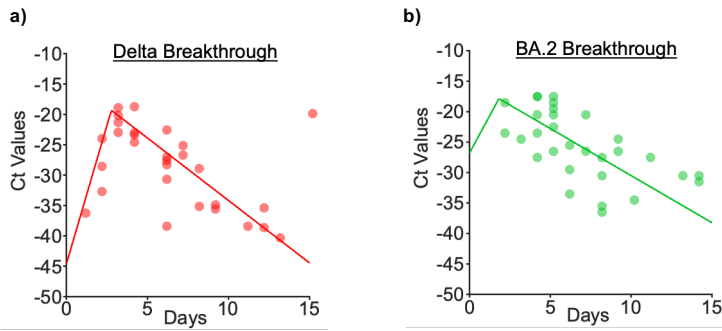

**Saliva SARS-CoV-2 VoC antibody signatures following breakthrough infections**

**% ACE2 Inhibition (≤5 days vs 2 weeks post-onset)**

**FcγR3a Responses (≤5 days vs 2 weeks post-onset)**

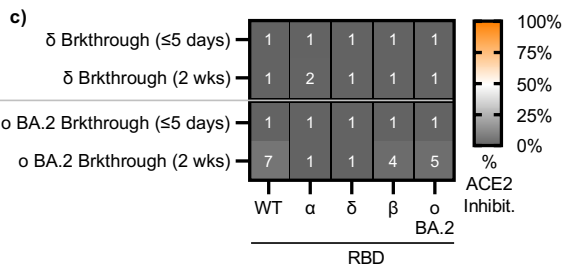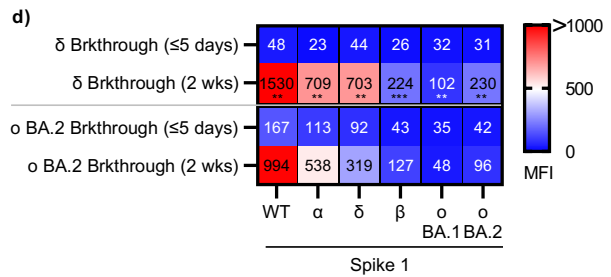

**Plasma SARS-CoV-2 VoC antibody signatures following breakthrough infections**

**% ACE2 Inhibition (≤5 days vs 2 weeks)**

**FcγR3a Responses (≤5 days vs 2 weeks)**

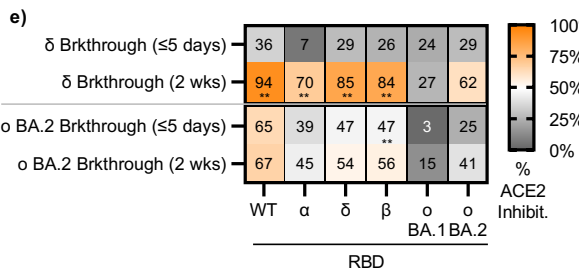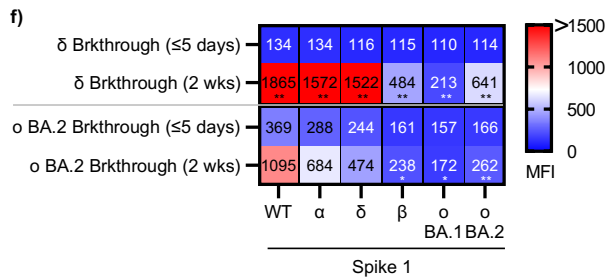

**Breakthrough infections, comparison of antibody responses vs viral load**

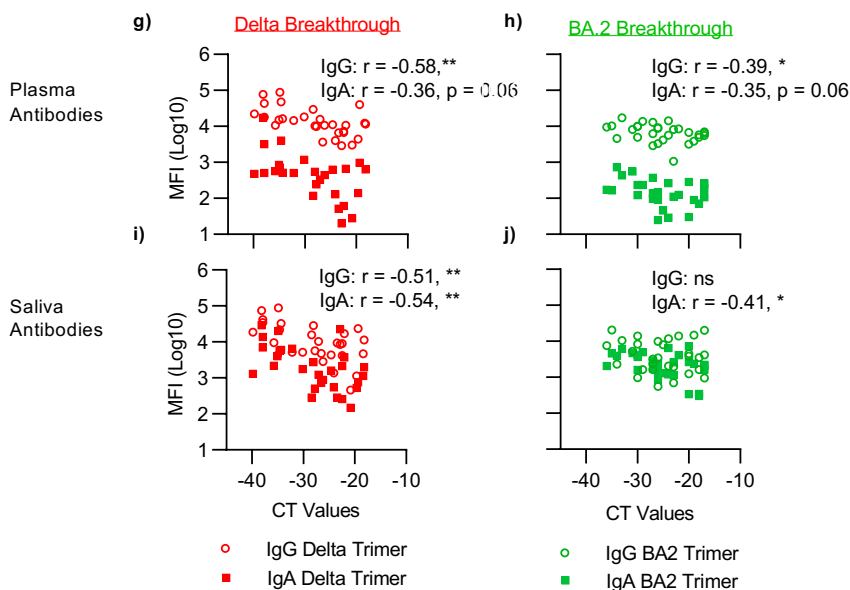

Saliva antibody responses over time, breakthrough infections

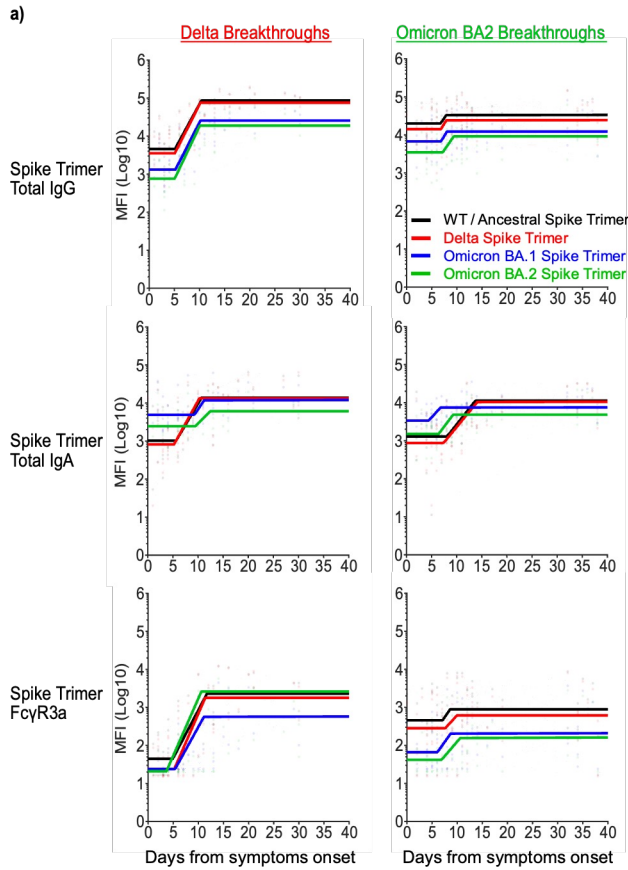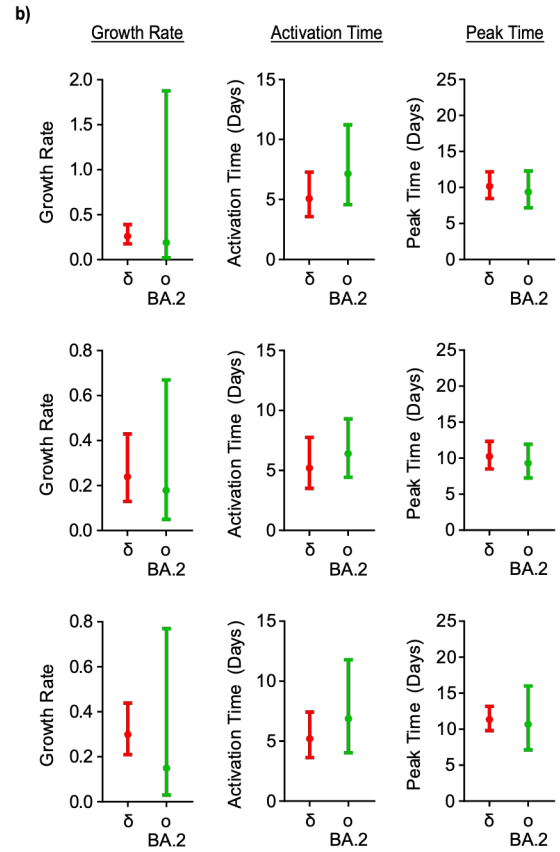

Plasma antibody responses over time, breakthrough infections

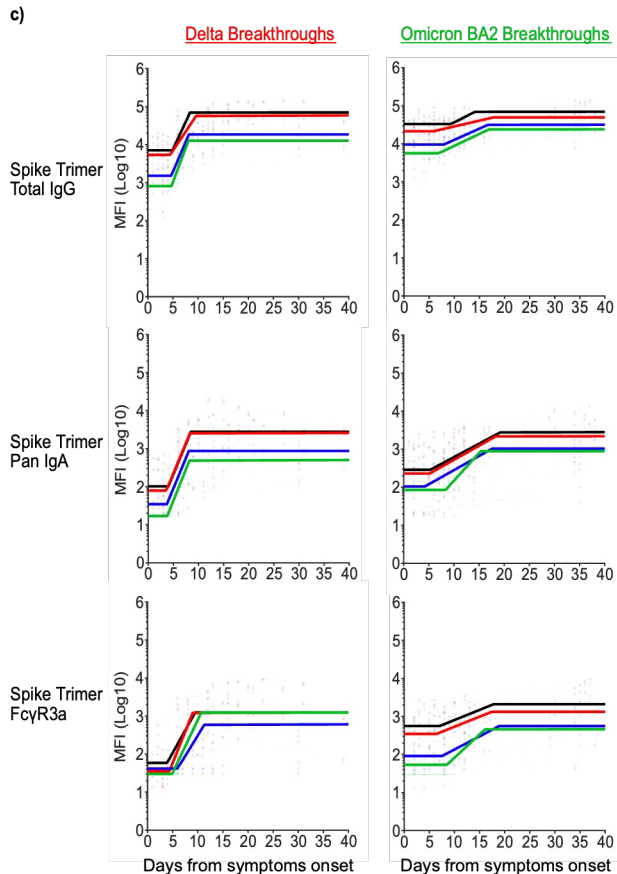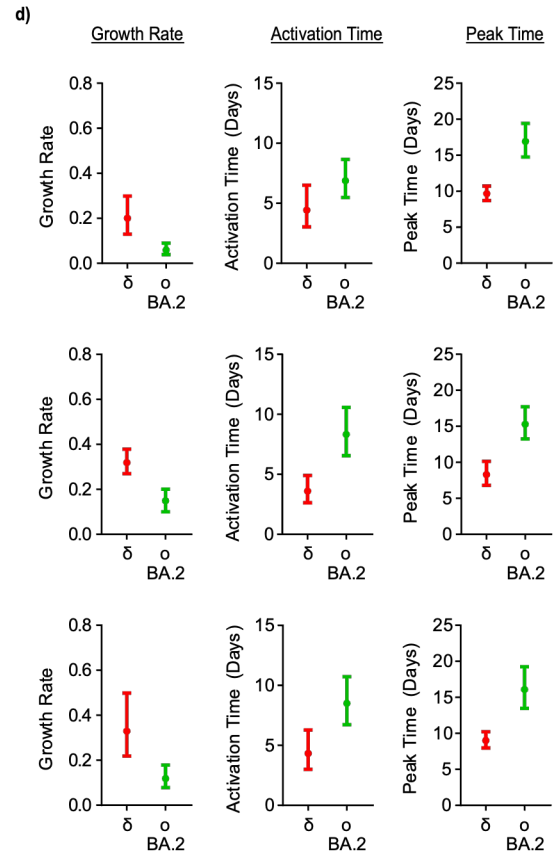

Supplement: Supplementary file [file media-1.pdf]
